# Supplementary material for: Infant and Young Child Feeding (IYCF) Practices in Rural and Urban Regions of Indonesia
Source: Hindawi journal article supplement (doi:10.1155/2024/6658959), 2024-05-11
Supplement: f2 [file 6658959.f2.pdf]

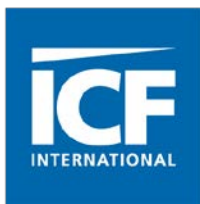

**Institutional Review Board Findings Form**  
**ICF IRB FWA00000845 (exp. 04/13/2019)**

**Project Director(s):** Sunita Kishor

**Project Title:** The Demographic and Health Survey (DHS) Program (DHS-7)

**ICF Project Number:** 132989.0.000

**Type of Review:**

☒ New      ☐ Modification      ☐ Annual review

**Findings of the Board:**

- ☒ Project complies with all of the requirements of 45 CFR 46, "Protection of Human Subjects"
- ☐ Project is exempt from IRB review (See IRB Exemption Form)
- ☐ Project does not comply with all of the requirements of 45 CFR 46

**Project Approved Until:** September 8, 2018

**Next Annual Review Date:** March 11, 2016

A handwritten signature in blue ink, appearing to be "Sunita Kishor", written over a horizontal line.

*Chair, Institutional Review Board*

March 11, 2015

*Date*

(Revised 07/18/2014)
