# Supplementary material for: Infant and Young Child Feeding (IYCF) Practices in Rural and Urban Regions of Indonesia
Source: Hindawi journal article supplement (doi:10.1155/2024/6658959), 2024-05-11
Supplement: f3 [file 6658959.f3.pdf]

**KOMITE ETIK PENELITIAN KESEHATAN  
HEALTH RESEARCH ETHICS COMMITTEE  
POLTEKKES KEMENKES BENGKULU  
POLTEKKES KEMENKES BENGKULU**

**KETERANGAN LAYAK ETIK  
DESCRIPTION OF ETHICAL EXEMPTION  
“ETHICAL EXEMPTION”**

No.KEPK.M/151/09/2021

Protokol penelitian yang diusulkan oleh :  
*The research protocol proposed by*

Peneliti Utama : Dr. Demsa Simbolon, SKM, MKM  
Principal In Inverstigator

Nama Institusi : Poltekkes Kemenkes Bengkulu  
Name of the Institution

Dengan judul:  
*Title*

**Model Intervensi Praktik Pemberian Makan Bayi Dan Anak (PMBA) di Daerah Pedesaan dan Perkotaan Indonesia**

Dinyatakan layak etik sesuai 7 (tujuh) Standar WHO 2011, yaitu 1) Nilai Sosial, 2) Nilai Ilmiah, 3) Pemerataan beban dan Manfaat, 4) Resiko, 5) Bujukan/Eksploitasi, 6) Kerahasiaan dan Privacy, dan 7) Persetujuan Setelah Penjelasan, yang merujuk pada Pedoman CIOMS 2016. Hal ini seperti yang ditunjukkan oleh terpenuhinya indikator setiap standar.

*Declared to be ethically appropriate in accordance to 7 (seven) WHO 2011 Standards, 1) Social Value, 2) Scientific Values, 3) Equitable Assasment and Benefit, 4) Risks, 5) Persuasion/Exploitation, 6) Confidentiality and Privacy, and 7) Informed Concent, referring to the 2016 CIOMS Guidelines, This is an indicated by fulfillment of the indicators of each standard.*

Pernyataan Laik Etik ini berlaku selama kurun waktu tanggal 07 September 2021 sampai dengan tanggal 07 September 2022.

*This declaration of ethics applies during the period September 07, 2021 until September 07, 2022*

  
September 07, 2021  
Professor and Chairperson  
Apt. Zamharira Muslim, M.Farm.
